# Supplementary figures and images for: Myristoyl’s dual role in allosterically regulating and localizing Abl kinase
Source: eLife journal article supplement (doi:10.7554/elife.85216), 2023-10-16

A

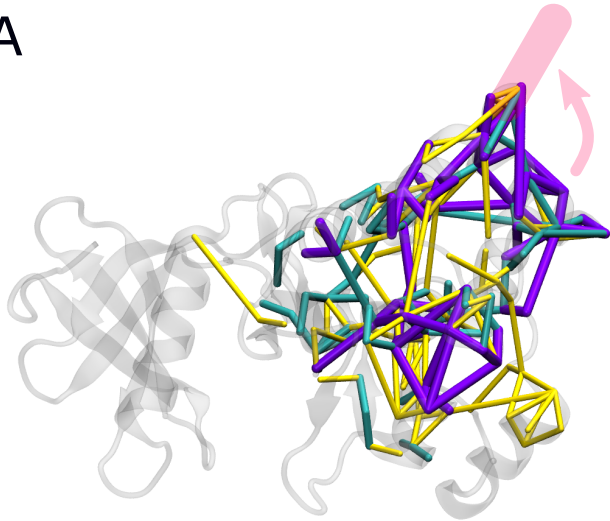

B

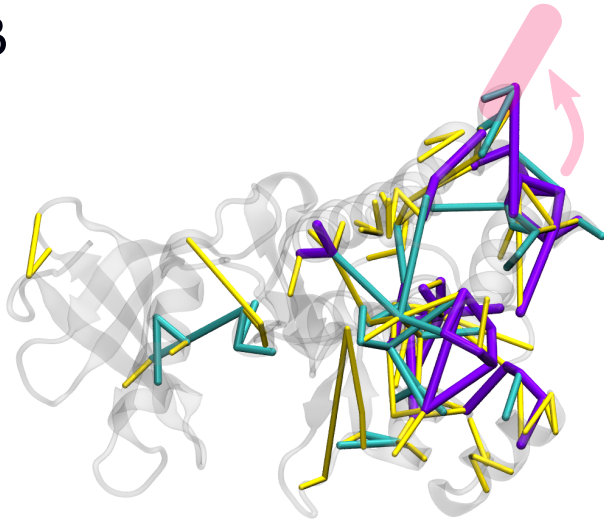

Supplement: supp [file elife-85216-supp-v1.zip]

**A**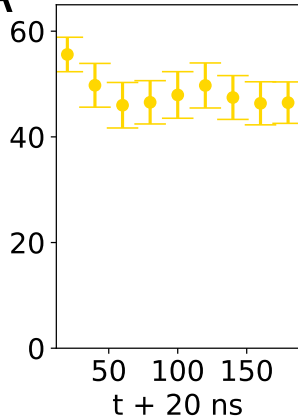**B**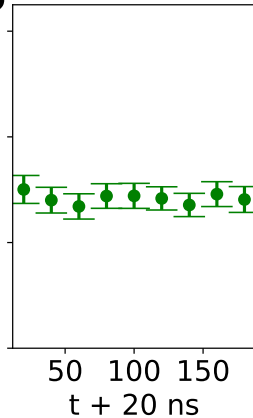**C**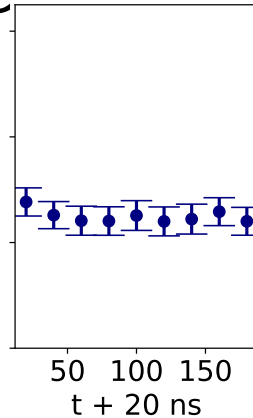**D**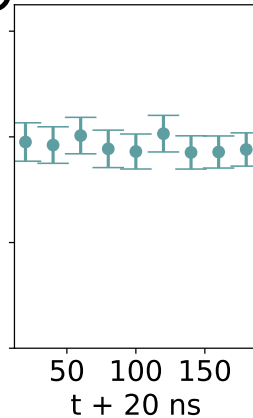**E**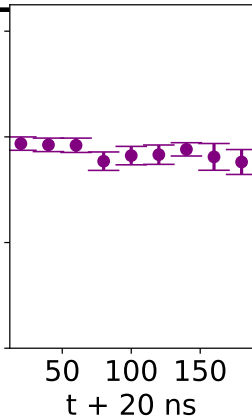

Supplement: supp [file elife-85216-supp-v1.zip]

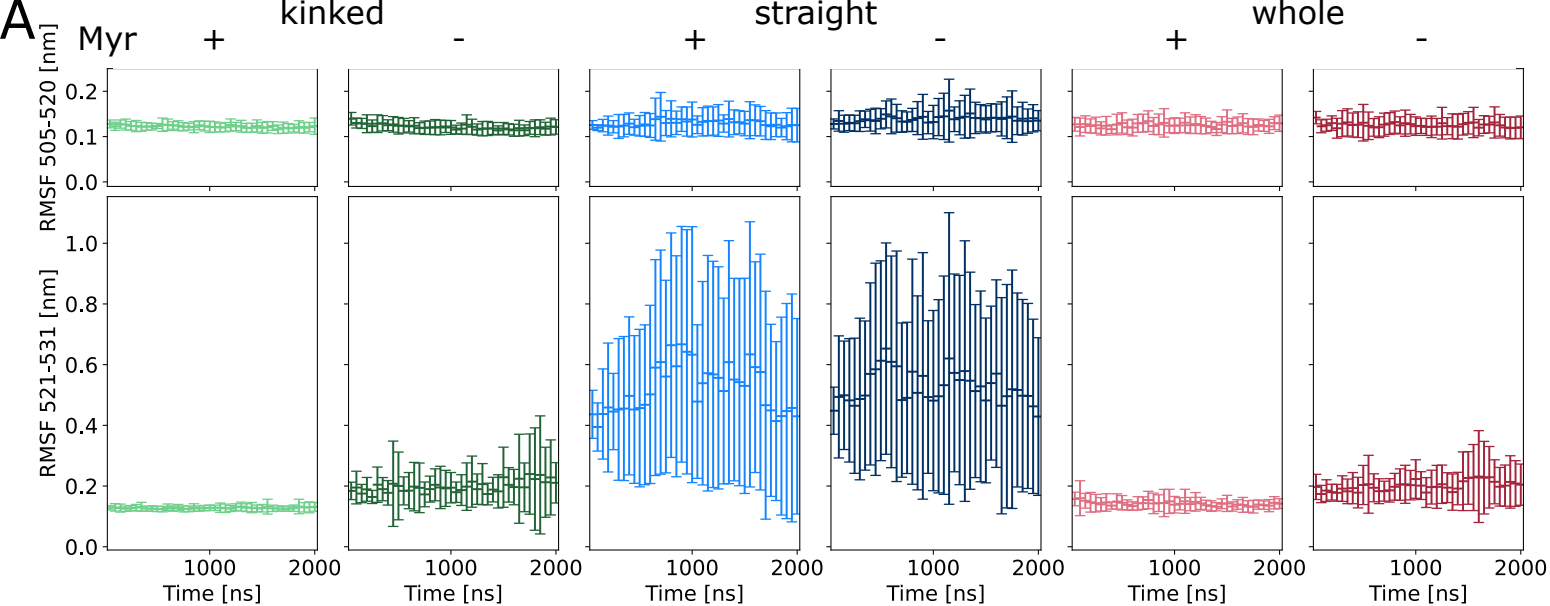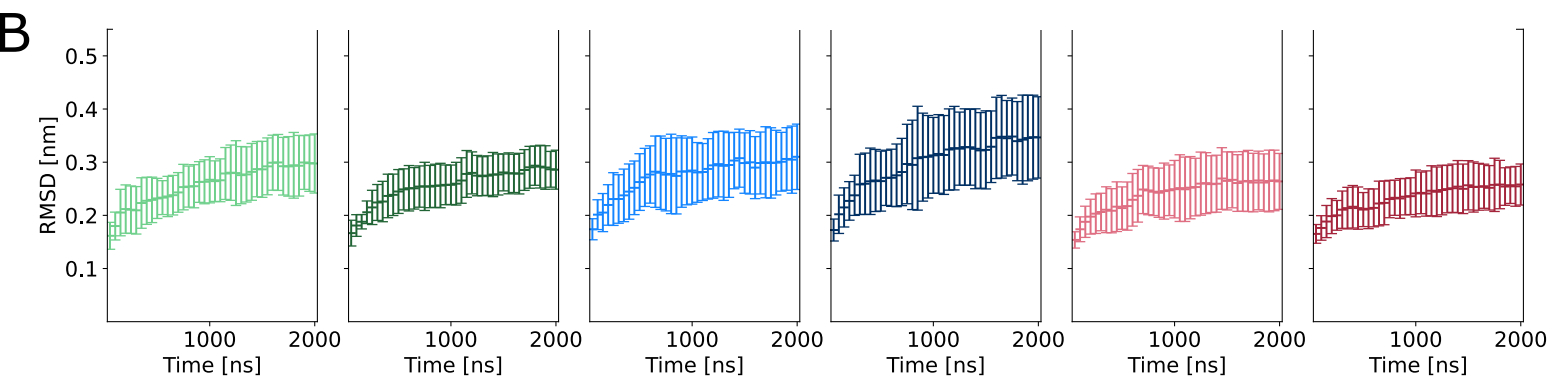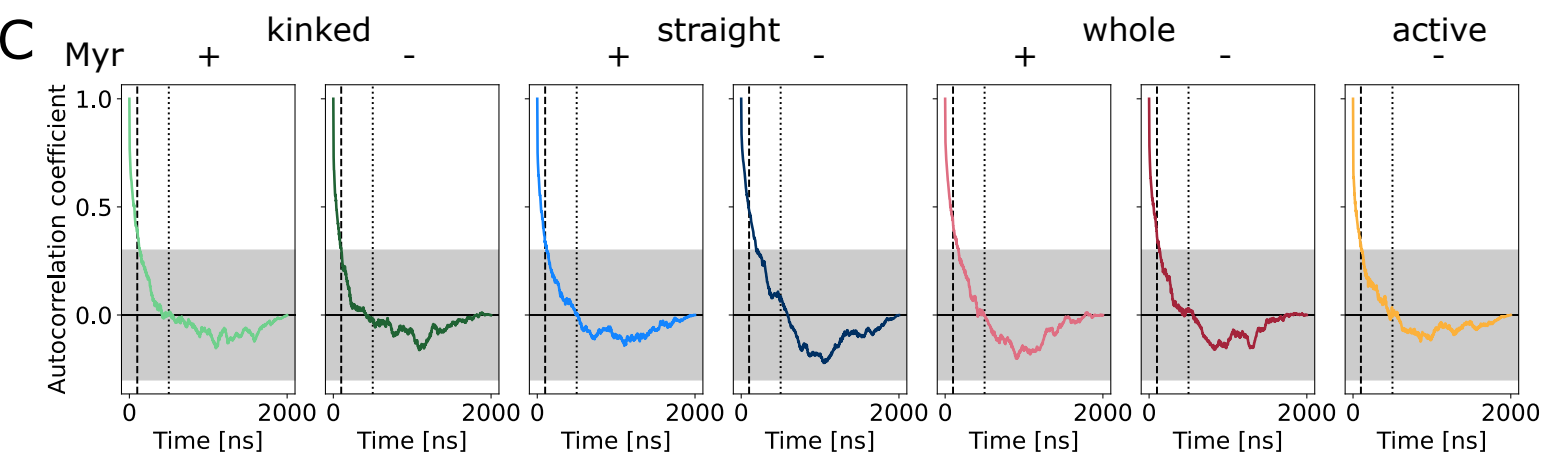

Supplement: supp [file elife-85216-supp-v1.zip]

kinked\_Myr

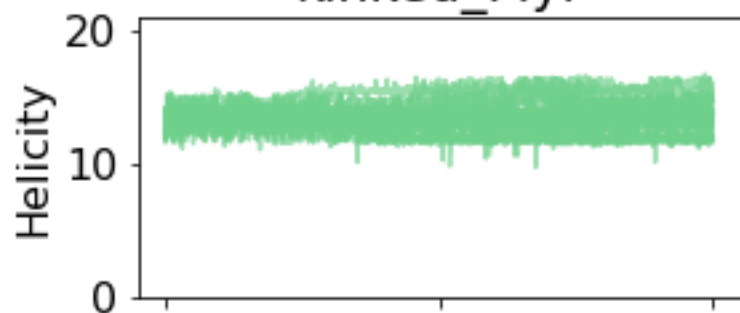

kinked\_noMyr

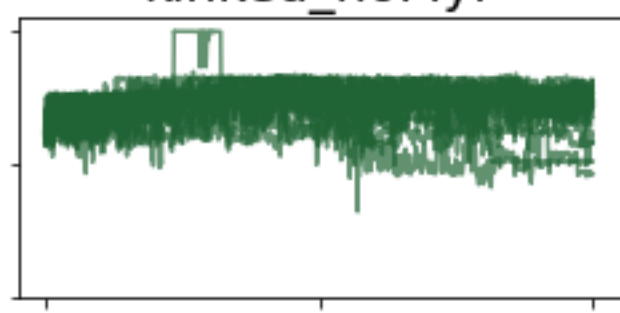

straight\_Myr

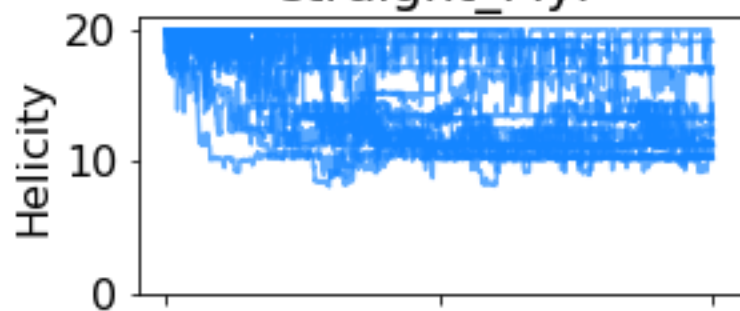

straight\_noMyr

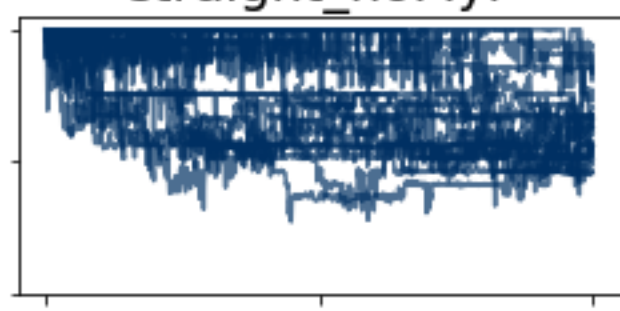

whole\_Myr

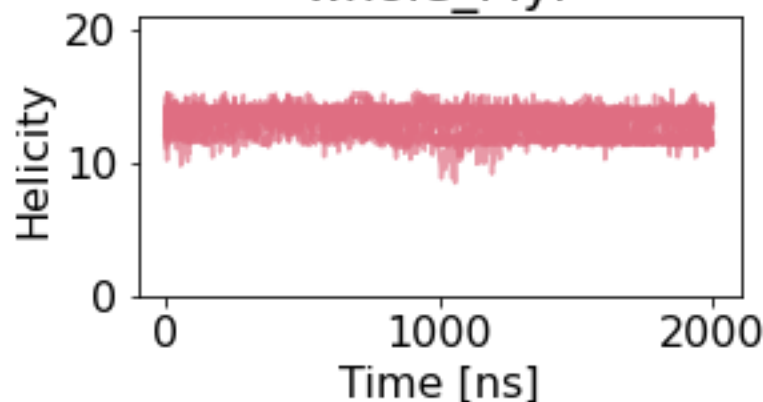

whole\_noMyr

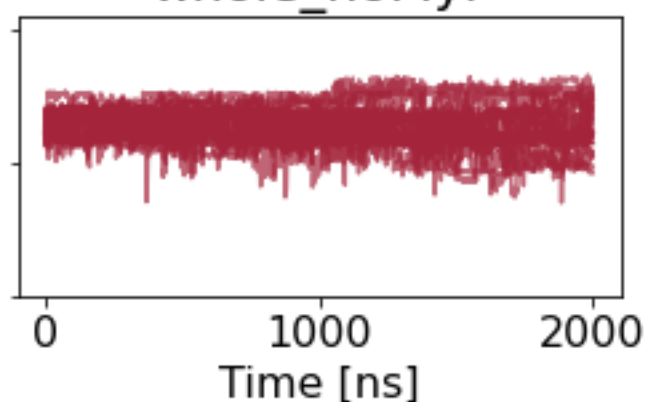

Supplement: supp [file elife-85216-supp-v1.zip]

A

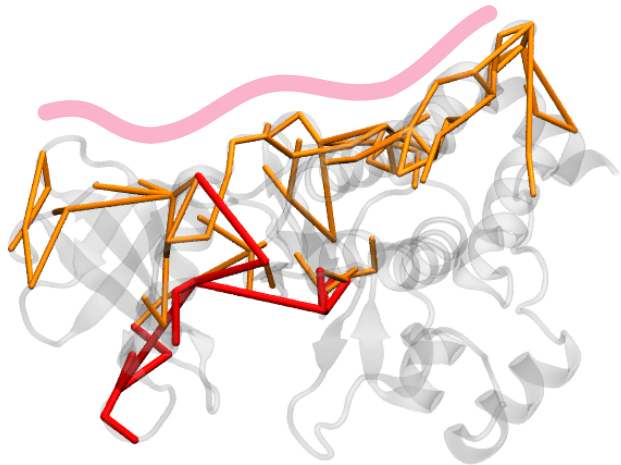

B

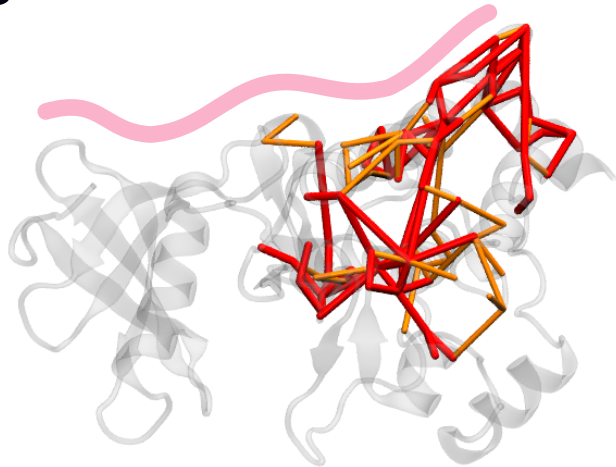

Supplement: supp [file elife-85216-supp-v1.zip]

**A**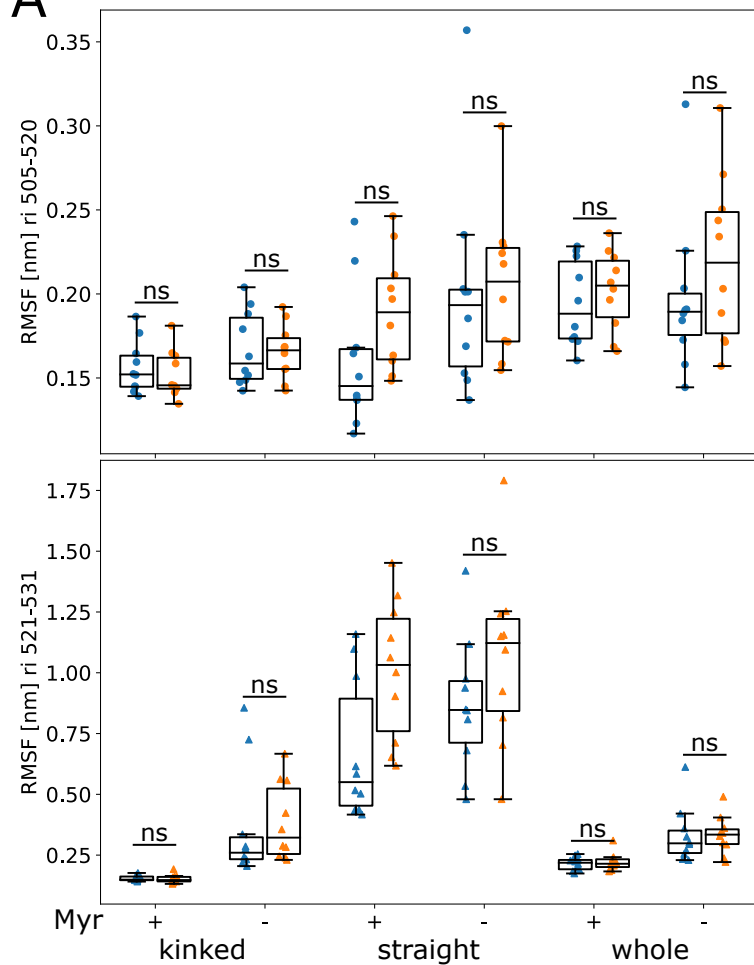**B**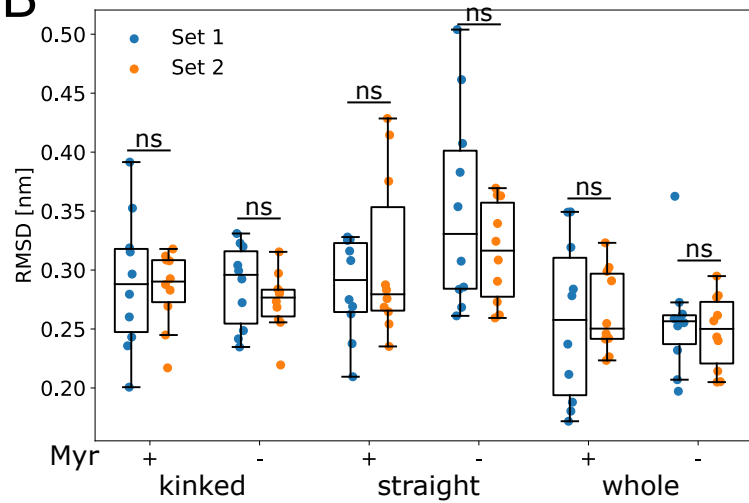**C**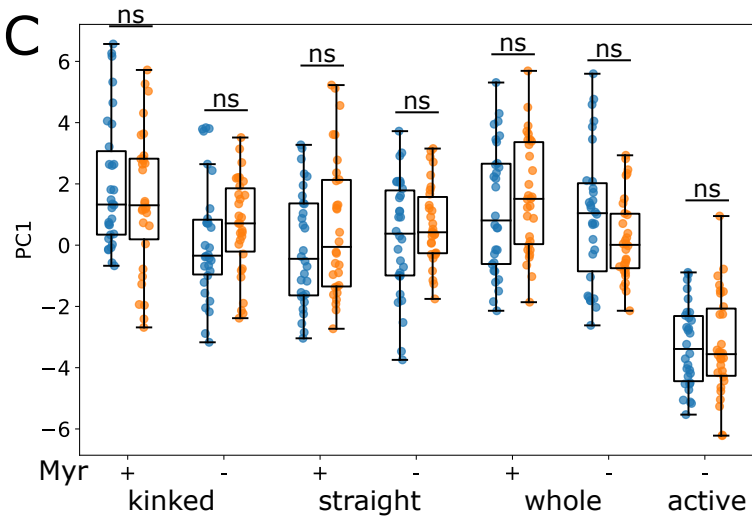

Supplement: supp [file elife-85216-supp-v1.zip]

**A**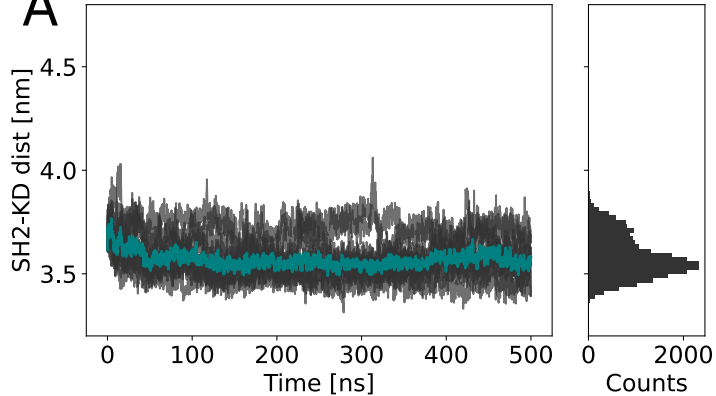**B**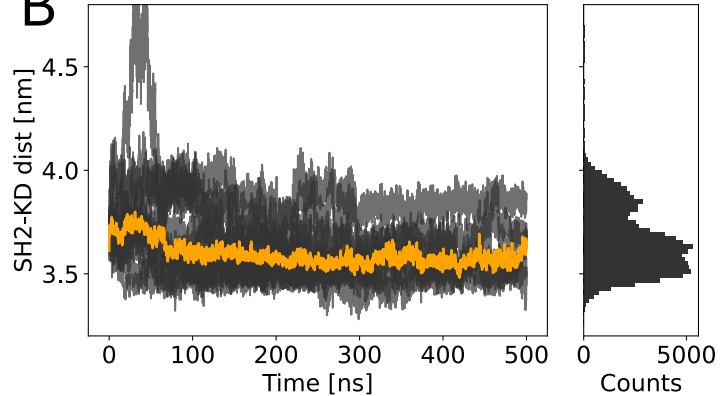

Supplement: supp [file elife-85216-supp-v1.zip]

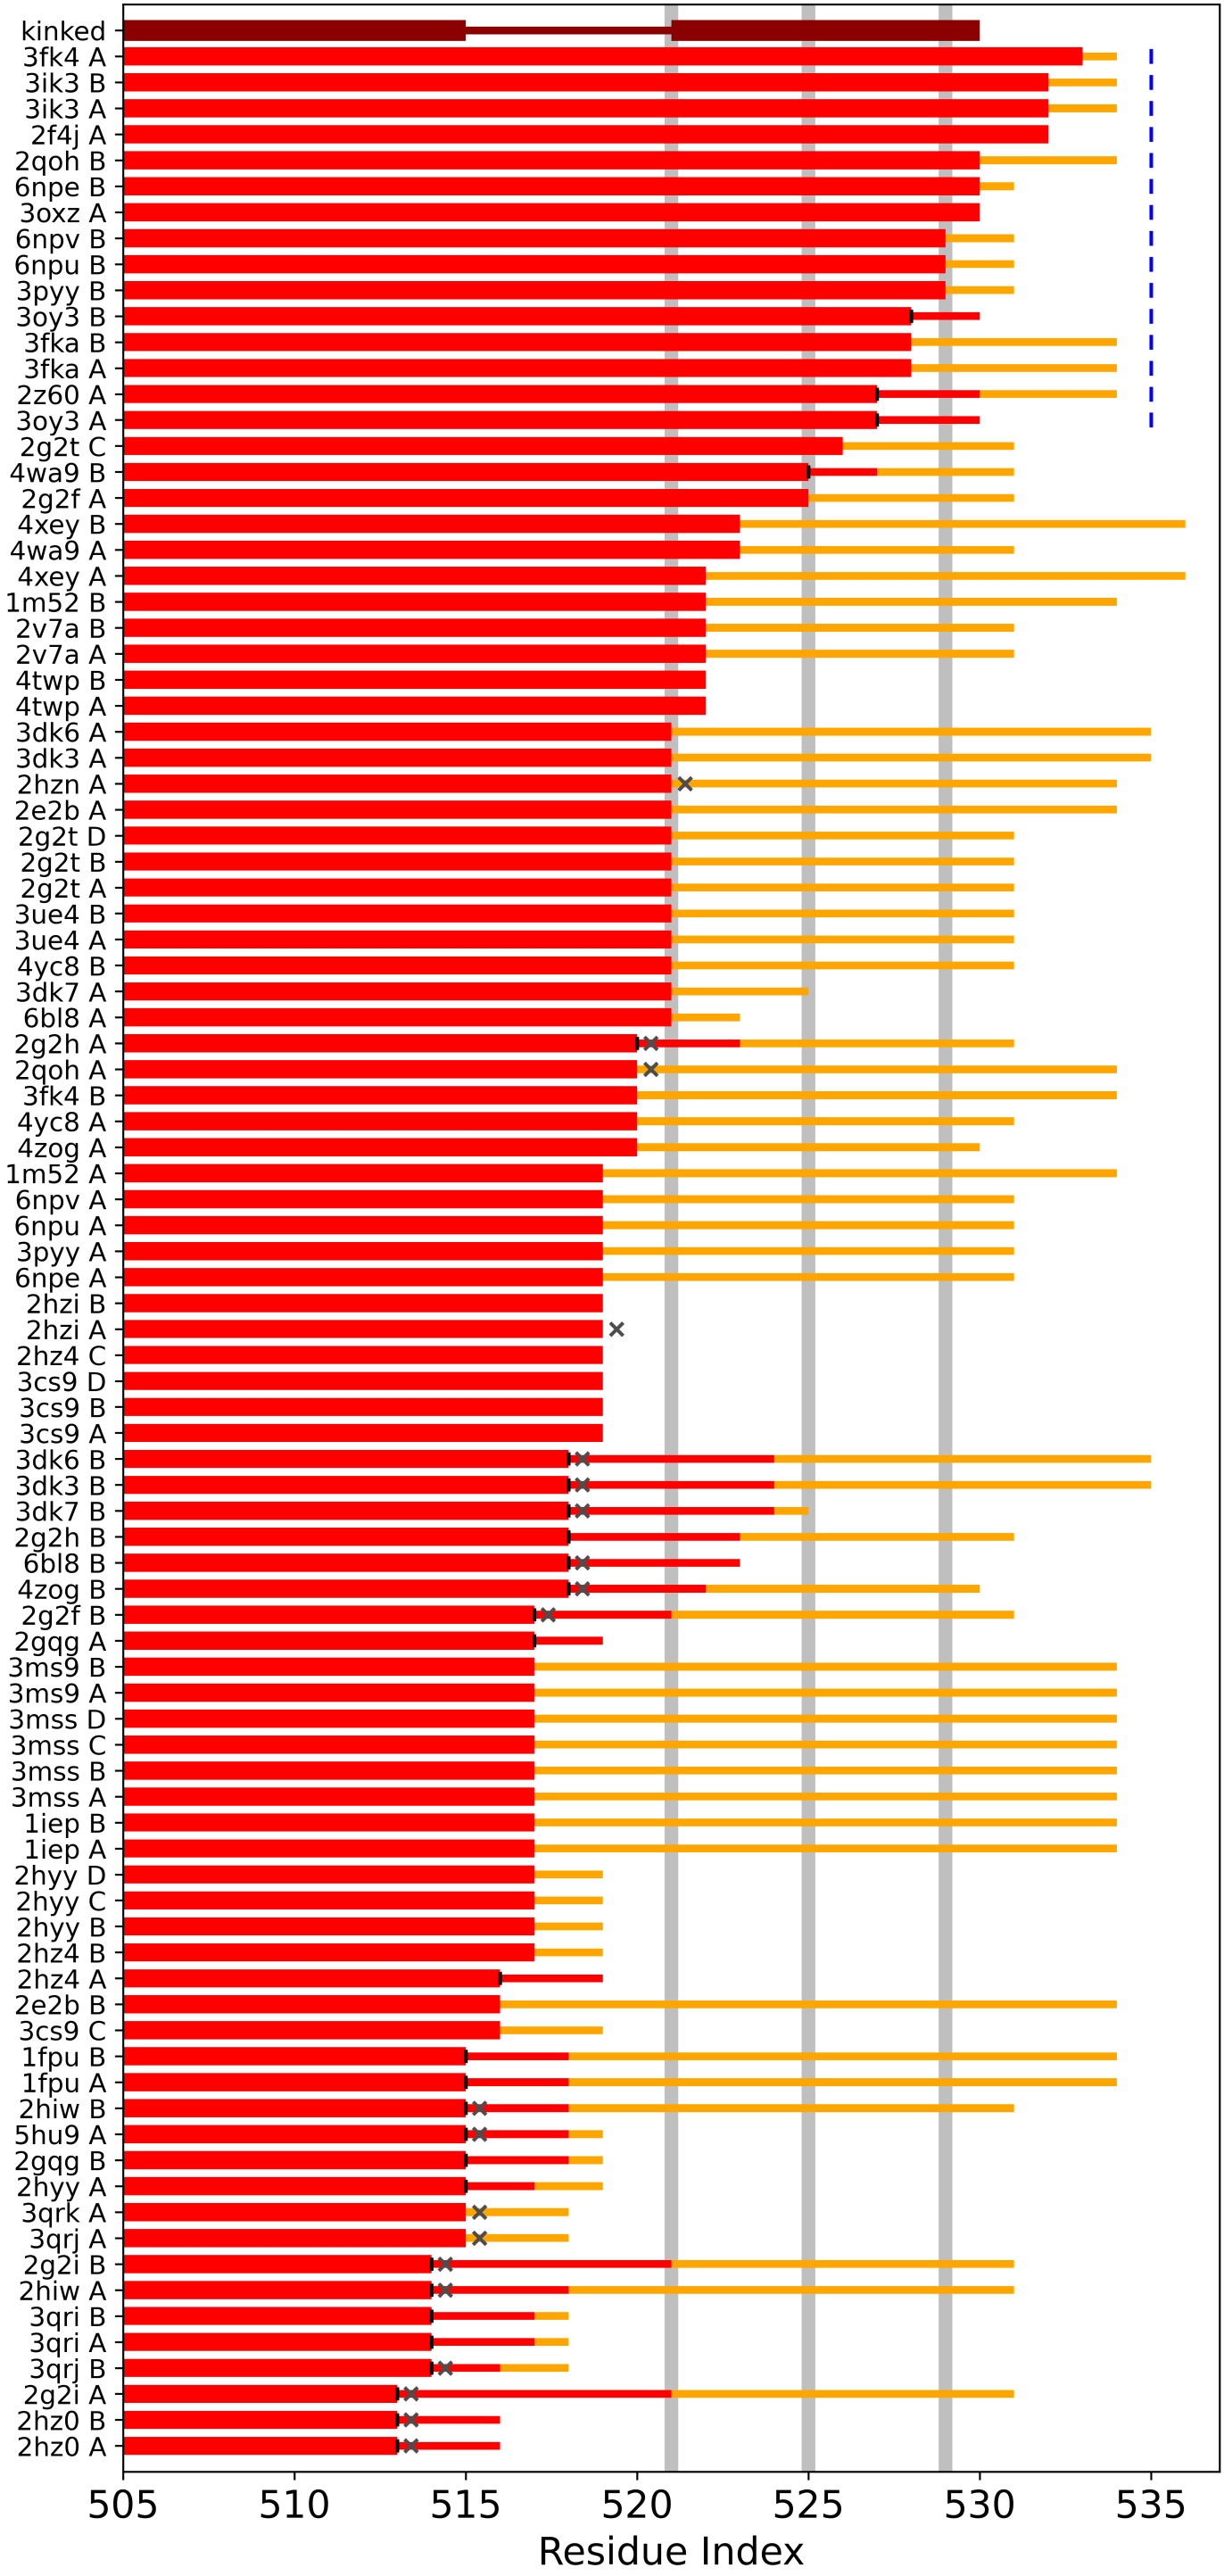

Supplement: supp [file elife-85216-supp-v1.zip]
